# Supplementary material for: Physiochemical Analysis of Drinking Water and Treatment with a Homemade Filter: A Case Study of Illu Abba Bor Zone, Ethiopia
Source: Hindawi journal article supplement (doi:10.1155/2022/4333938), 2022-12-31
Supplement: f1 [file 4333938.f1.zip]

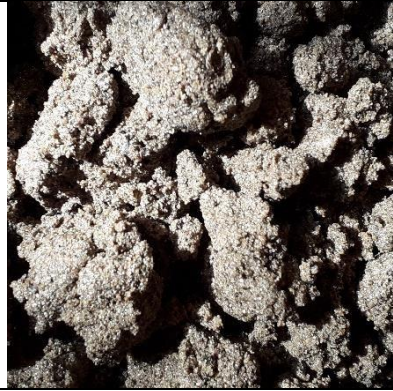

(a)

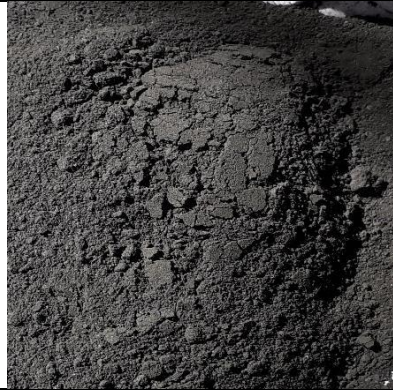

(b)

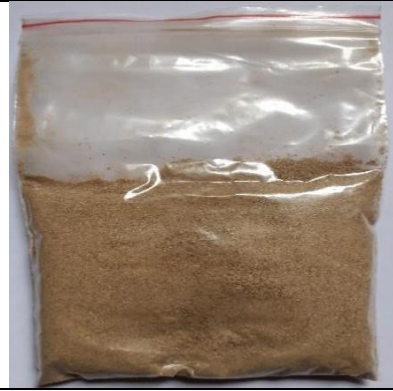

(c)

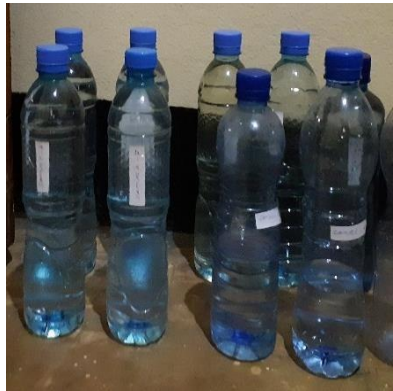

(d)

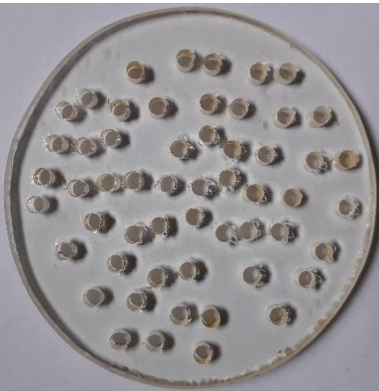

(e)

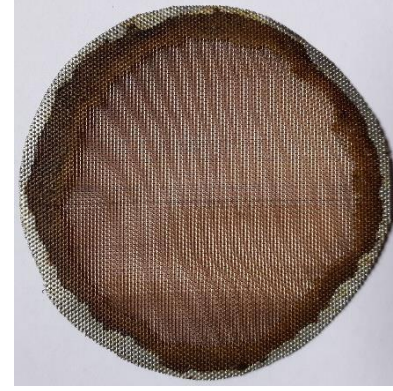

(f)

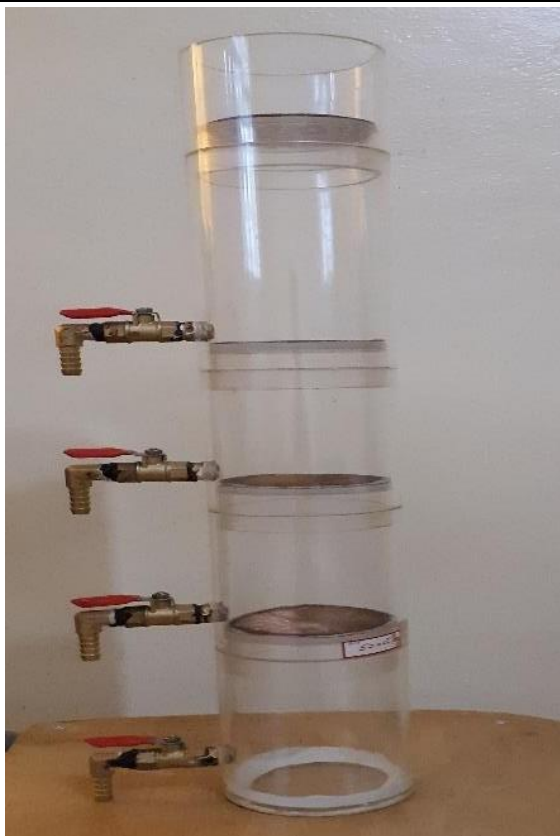

(g)

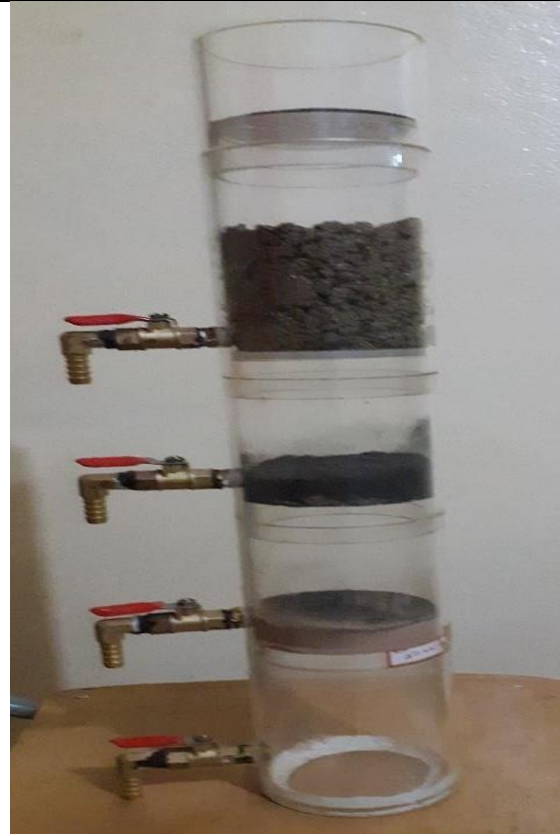

(h)

**Figure S3:** (a) Sand, (b) Charcoal, (c) Powder of Banana Pseudo stem and (d) water samples for testing (e) 2 mm Perforated Plate (f) 0.1 mm Copper mesh (g) Homemade filter setup (h) Homemade filter setup with filter media.
