# Supplementary material for: Physiochemical Analysis of Drinking Water and Treatment with a Homemade Filter: A Case Study of Illu Abba Bor Zone, Ethiopia
Source: Hindawi journal article supplement (doi:10.1155/2022/4333938), 2022-12-31
Supplement: f1 [file 4333938.f1.zip]

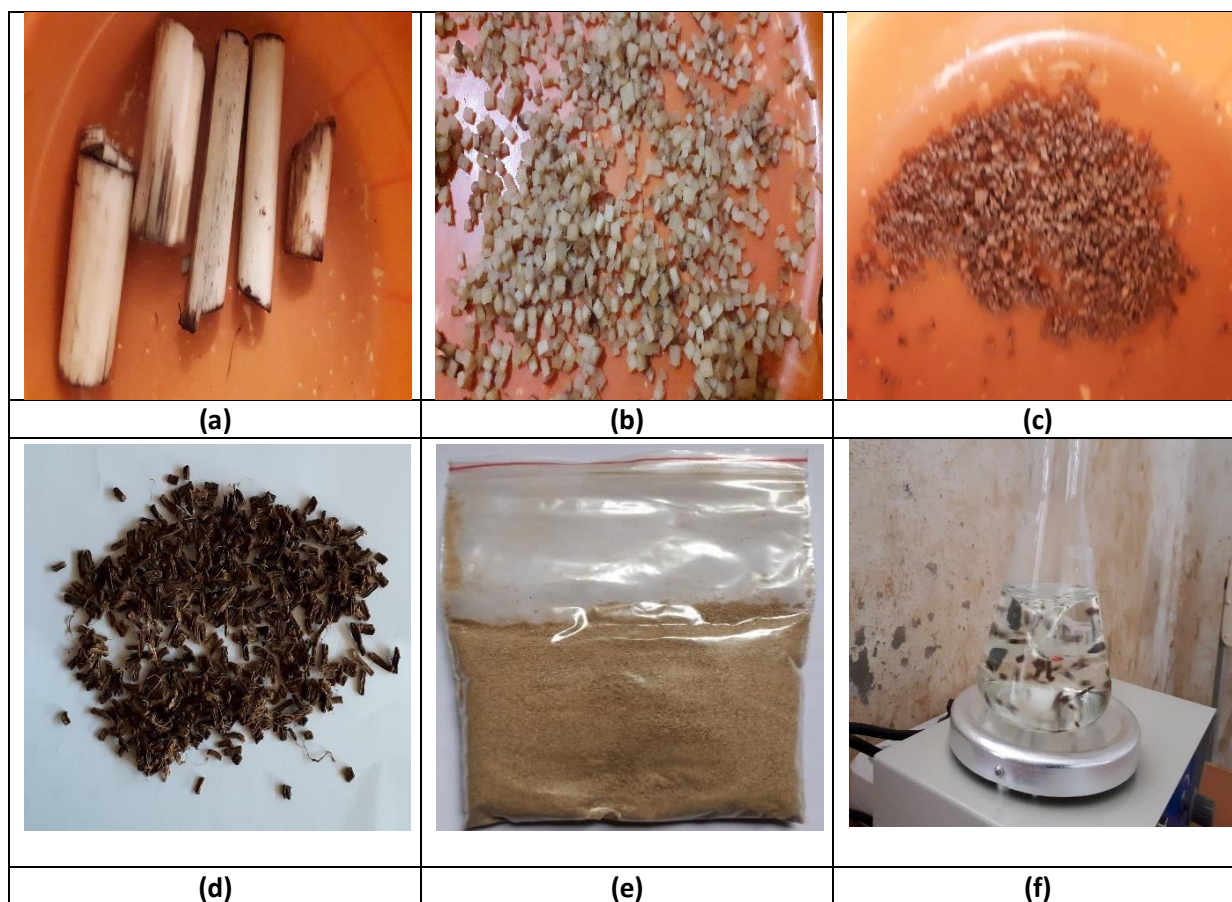

**Figure S2: (a) Banana Pseudostem, (b) 1 cm pieces, (c) Drying, (d) Dried Product, (e) Fine Product, (f) Batch experiments**
