# Supplementary figures and images for: Physiochemical Analysis of Drinking Water and Treatment with a Homemade Filter: A Case Study of Illu Abba Bor Zone, Ethiopia
Source: Hindawi journal article supplement (doi:10.1155/2022/4333938), 2022-12-31

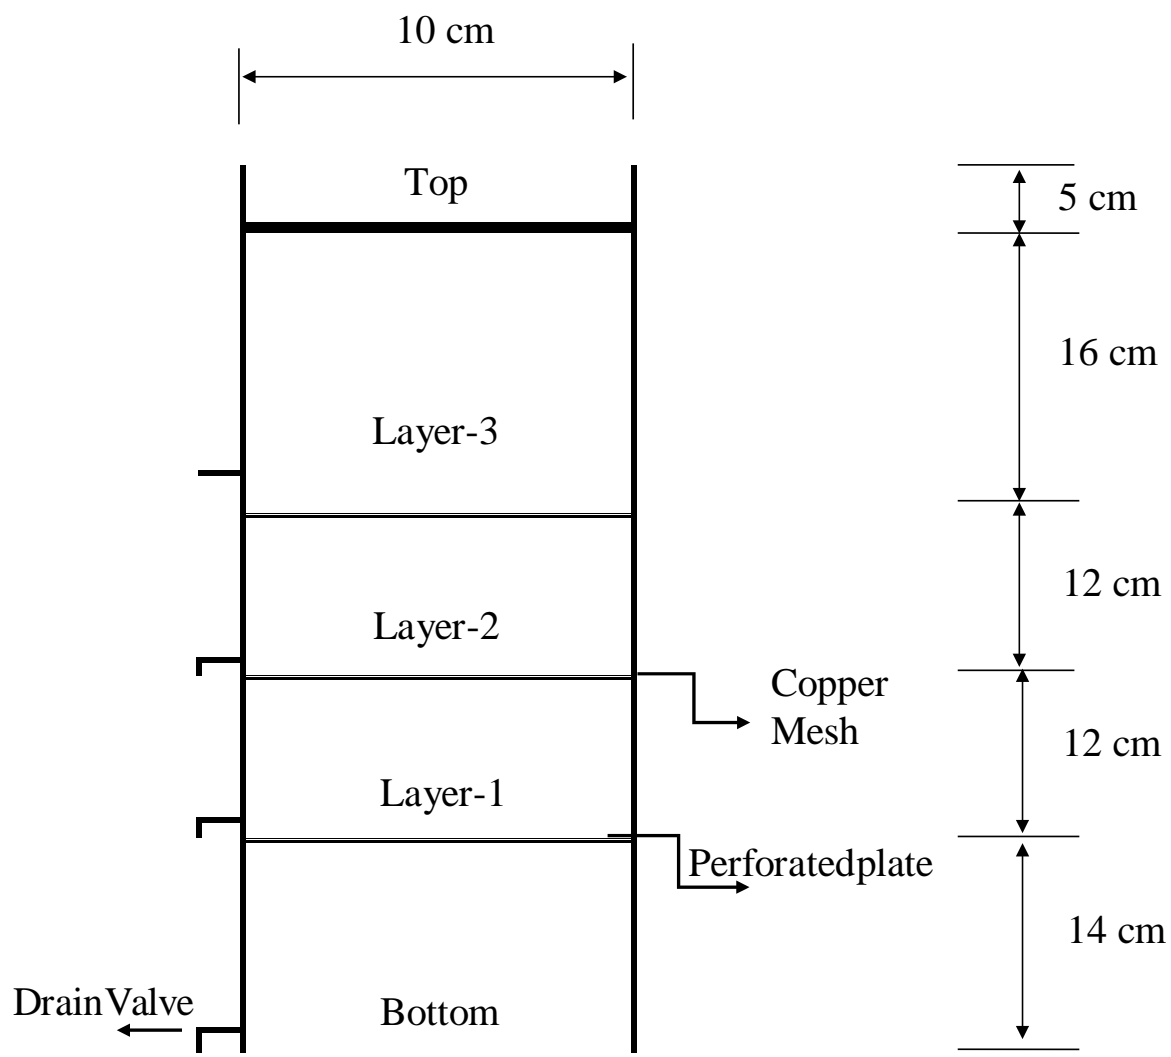

**Figure S1 Home Made Filter for Adsorption**

Supplement: f1 [file 4333938.f1.zip]
